# Supplementary material
Source: Springer Nature journal article supplement (https://www.springermedizin.de/resource/supplementary/12890_2012_650_MOESM4_ESM.pdf/9505512)

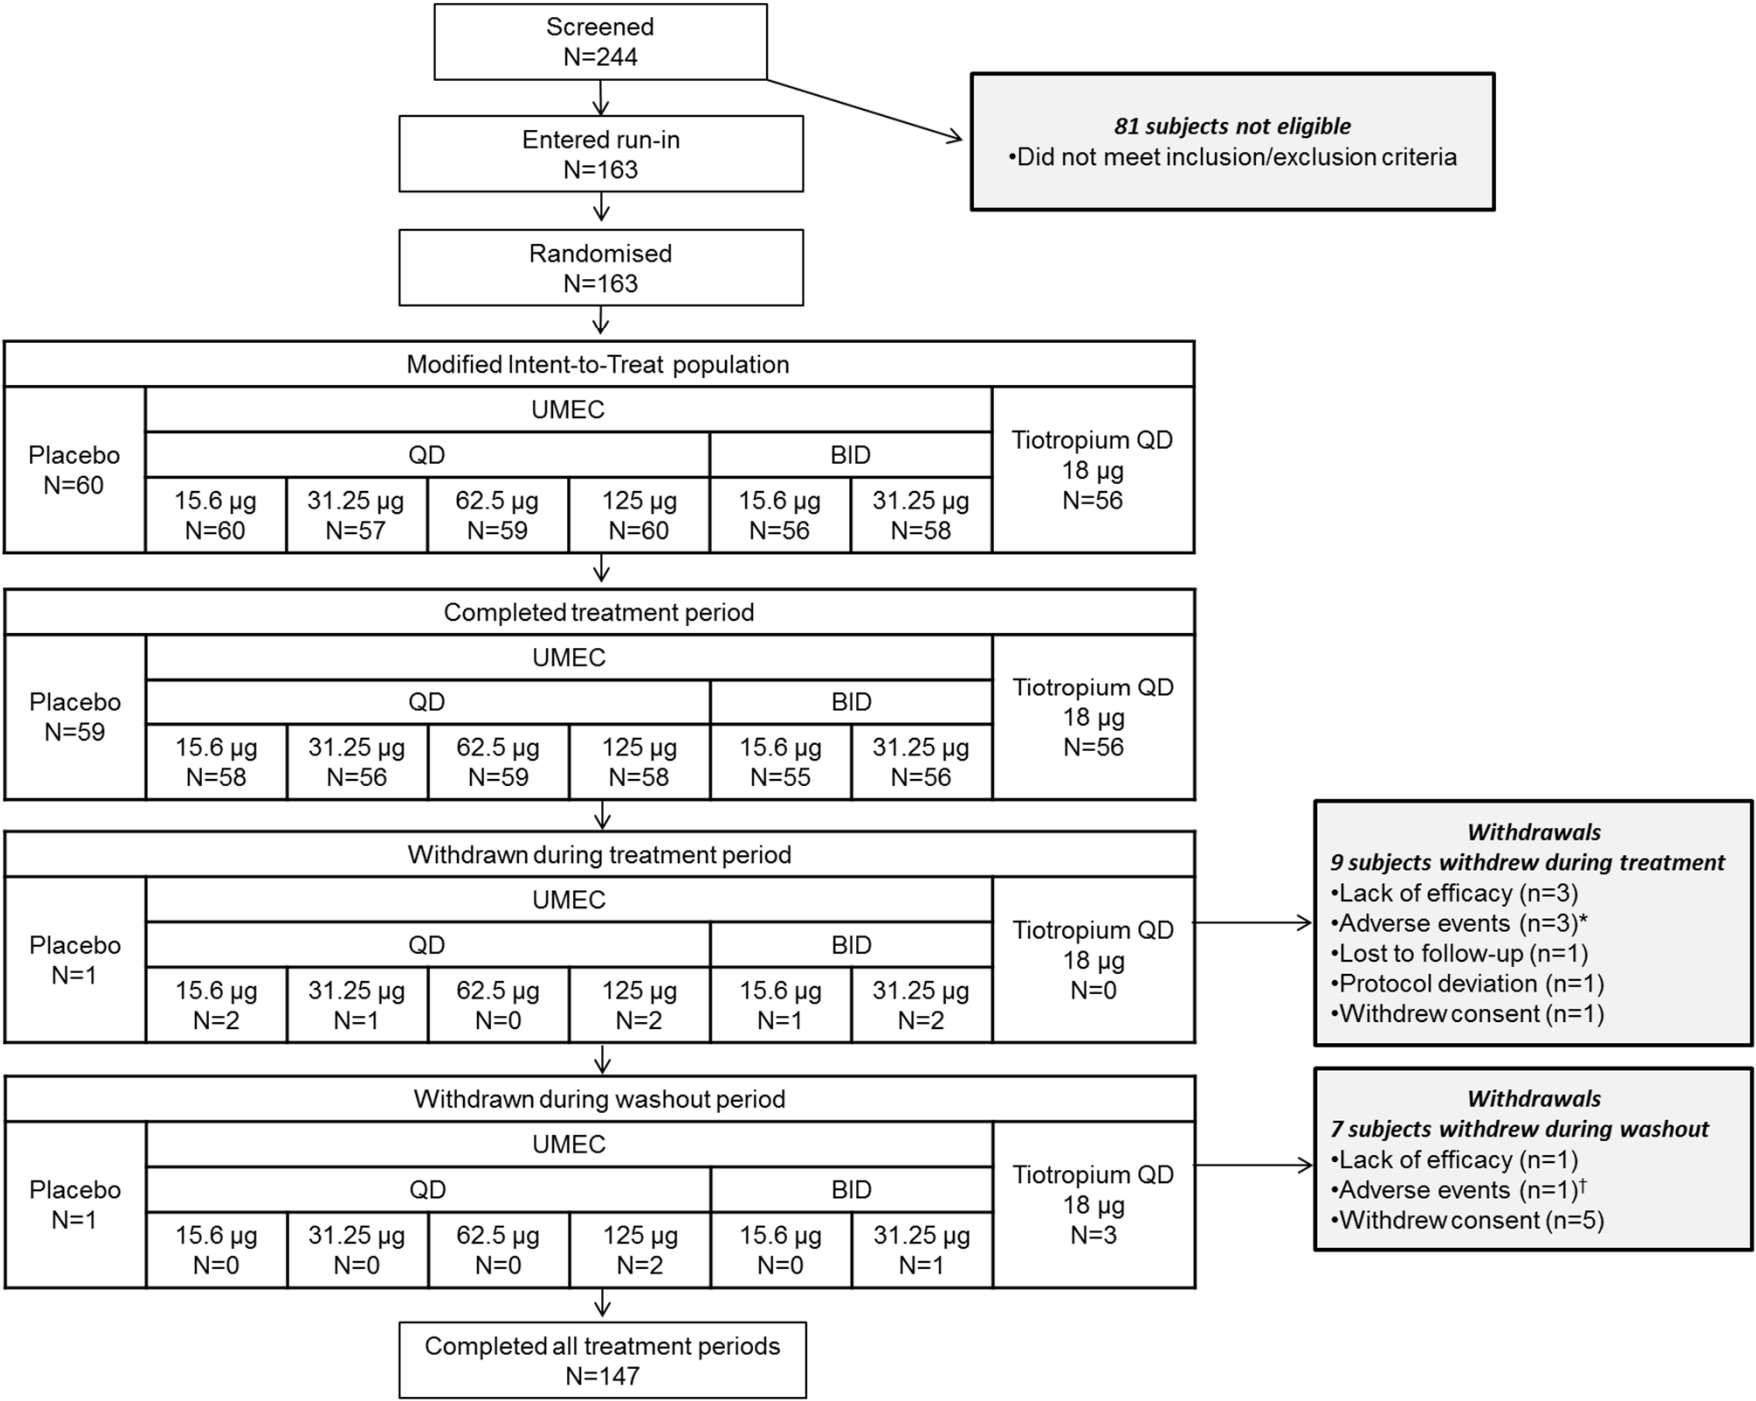

Supplement: MOESM4 [file 9505512]
